# Supplementary material for: miR-221/222 Promotes S-Phase Entry and Cellular Migration in Control of Basal-Like Breast Cancer
Source: PubMed Central journal article supplement (PMC6271560; doi:10.3390/molecules19067122), 2014-05-30

# Supplementary Information

**Figure S1.** The list of miRNAs with elevated expression in BLBC patients.

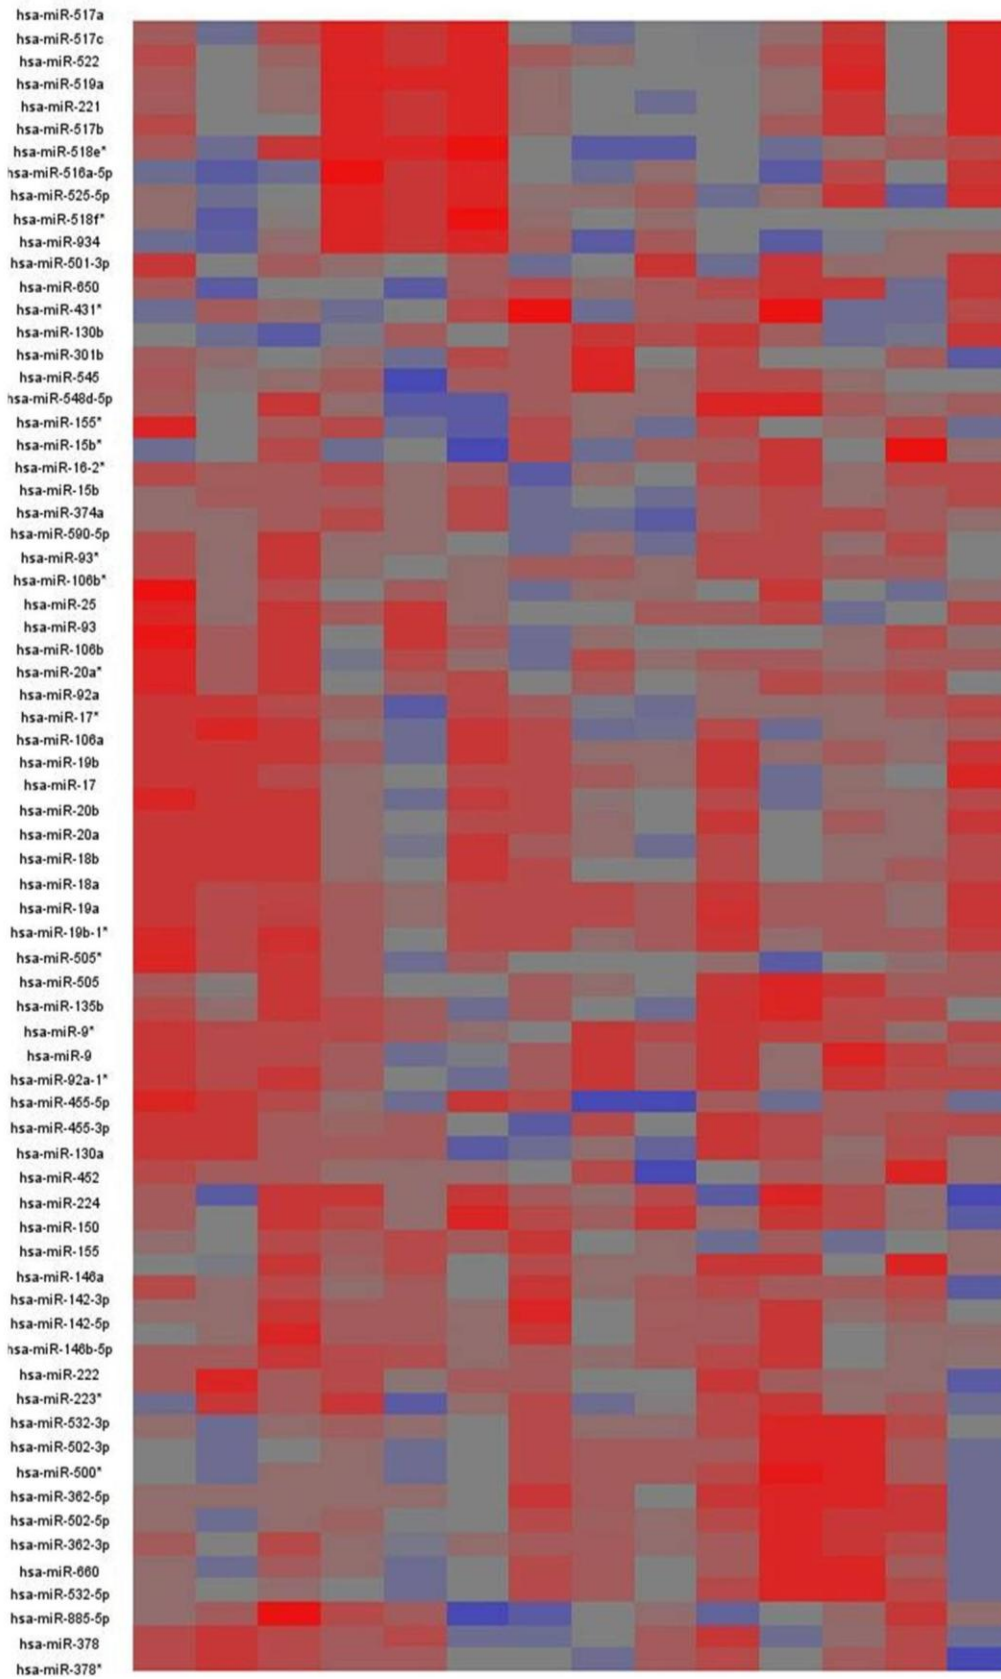

**Figure S2.** (A) miRNA inhibitors targeting miR-221 and miR-222 both suppressed migration in Hs578t cells. (B) Quantitative analysis of the migrated cell numbers in the wounds at day 3. Data are mean  $\pm$  SEM ( $n = 3$ ). \*\*  $p < 0.01$ .

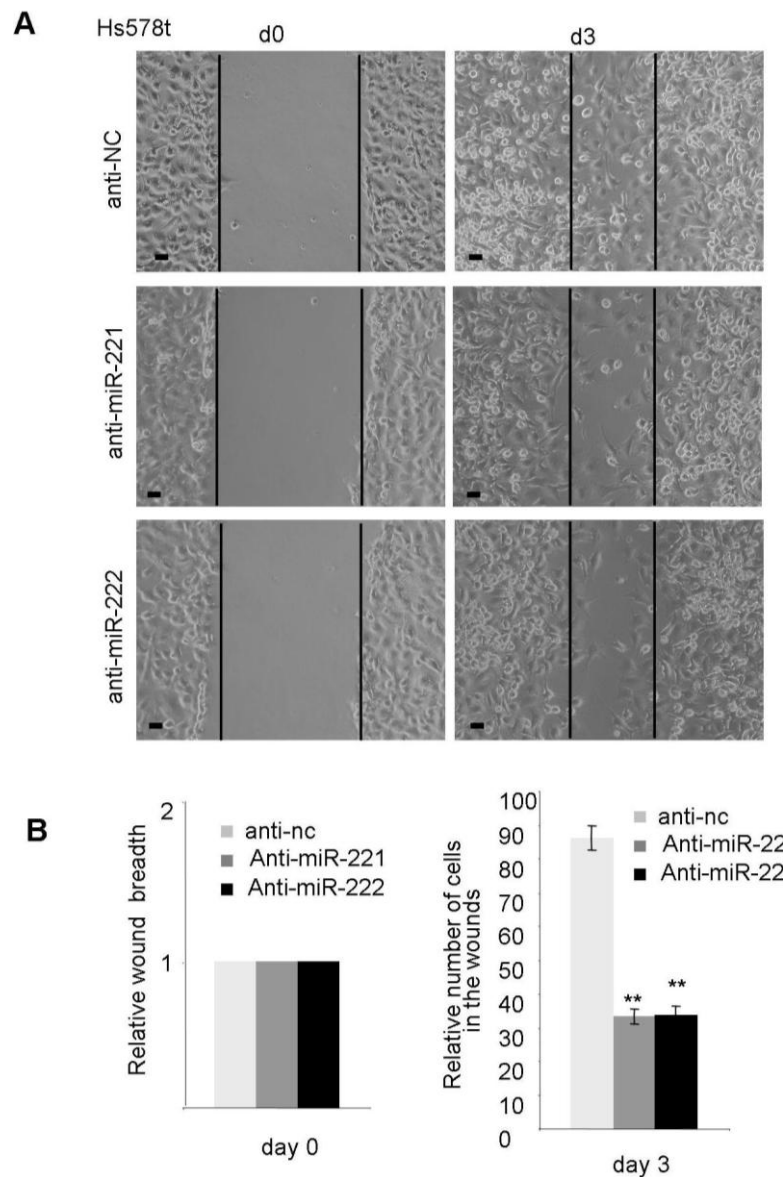

**Figure S3.** Quantitative analysis of the cell percentage at the different stages of a cell cycle in Figure 4C. \*  $p < 0.05$ , \*\*  $p < 0.01$ .

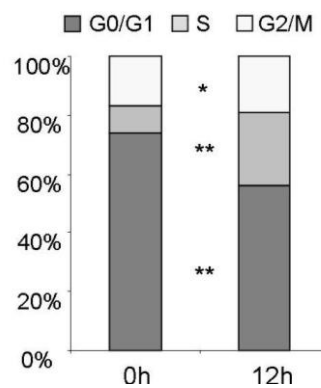

**Figure S4.** Quantitative real time PCR analysis showing SOCS1 mRNA decreased in miR-221- and miR-222- overexpressing MDA-MB-231 cells. Data are mean  $\pm$  SEM ( $n = 3$ ). \*\*  $p < 0.01$ .

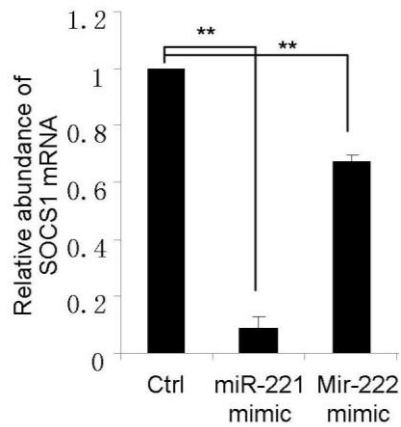

**Figure S5.** Luciferase reporter assays indicating direct interaction and inhibition of CDKN1B 3'UTR by miR-221 and miR-222. A mutated vector targeting miR-221/222 binding site did not show such inhibition by miR-221/222. Data are mean  $\pm$  SEM ( $n = 3$ ). \*  $p < 0.05$ , \*\*  $p < 0.01$ .

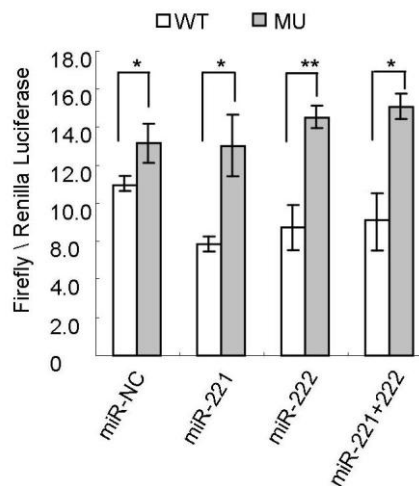

Supplement: molecules-19-07122-s001.pdf [file molecules-19-07122-s001.pdf]
